# Supplementary material
Source: publisher site journal article supplement (https://www.dovepress.com/get_supplementary_file.php?f=246995.docx)
Supplement: Supplementary file 1 [file get_supplementary_file.php]

| Supplementary table 1: survival risk under different methylation rates by R packages | | | | | | | | | | | | | | | | | | | | | | |
| --- | --- | --- | --- | --- | --- | --- | --- | --- | --- | --- | --- | --- | --- | --- | --- | --- | --- | --- | --- | --- | --- | --- |
| AMR | | |  | M3 | | |  | M5 | | |  | M7 | | |  | M8 | | |  | M27 | | |
| MR | HR | *P* value |  | MR | HR | *P* value |  | MR | HR | *P* value |  | MR | HR | *P* value |  | MR | HR | Pvalue |  | MR | HR | *P* value |
| 0.2689542 | 1.2382736 | 0.3910538 |  | 0.0418848 | 1.2534187 | 0.594346 |  | 0 | Inf | 0.5221906 |  | 0.056701 | 1.2347202 | 0.6192777 |  | 0 | Inf | 0.6223706 |  | 0 | 0.4697158 | 0.4391694 |
| 0.3487851 | 1.6036466 | 0.0558848 |  | 0.5705563 | 1.0140694 | 0.9648274 |  | 0.0224404 | Inf | 0.3244638 |  | 0.550767 | 0.7888907 | 0.4012464 |  | 0 | Inf | 0.4181636 |  | 0 | 1.3521951 | 0.7619778 |
| 0.3738749 | 1.7648147 | 0.0238904 |  | 0 | Inf | 0.1576493 |  | 0.0285006 | Inf | 0.1983291 |  | 0.110742 | 1.2963783 | 0.397481 |  | 0 | 0.71011 | 0.7306344 |  | 0 | 0.998258 | 0.9986089 |
| 0.1350616 | 1.257162 | 0.4845871 |  | 0.0804734 | 1.1959447 | 0.5992907 |  | 0.0407555 | Inf | 0.1545735 |  | 0.0960452 | 1.4764042 | 0.2322278 |  | 0 | 0.5972323 | 0.4646404 |  | 0.0285714 | 1.6633632 | 0.6068818 |
| 0.2469728 | 1.199264 | 0.4750914 |  | 0.0339751 | 1.0042986 | 0.9925857 |  | 0.0426357 | 2.4508028 | 0.3539746 |  | 0.0428571 | 1.6448588 | 0.3912236 |  | 0 | 0.5460552 | 0.2950263 |  | 0.0551905 | 0.9403312 | 0.9311513 |
| 0.3064041 | 1.4306121 | 0.1429344 |  | 0.4143721 | 0.901095 | 0.6719882 |  | 0.0438356 | 1.4424964 | 0.6051901 |  | 0.5601533 | 0.9166284 | 0.759701 |  | 0 | 0.7200925 | 0.573968 |  | 0.055199 | 1.278804 | 0.7293156 |
| 0.2806909 | 1.2744249 | 0.3245082 |  | 0.1236443 | 1.4281334 | 0.2585562 |  | 0.0475594 | 1.7327314 | 0.434784 |  | 0.1578947 | 1.1424267 | 0.6342007 |  | 0 | 0.9064207 | 0.8669754 |  | 0.0552326 | 0.8582981 | 0.7942346 |
| 0.780494 | 1.0138596 | 0.984419 |  | 0.1577123 | 1.1629735 | 0.5894539 |  | 0.0520833 | 2.0832809 | 0.2918245 |  | 0.9632546 | 0 | 0.5515208 |  | 0.0157195 | 1.0960765 | 0.8757049 |  | 0.0657277 | 1.0502914 | 0.9333364 |
| 0.2779675 | 1.3513653 | 0.2218314 |  | 0.0955795 | 1.4741053 | 0.2338923 |  | 0.0546117 | 1.5164044 | 0.4744086 |  | 0.0758988 | 1.4982333 | 0.2528874 |  | 0.018018 | 1.2032478 | 0.7521576 |  | 0.0663781 | 1.2457406 | 0.7074331 |
| 0.1784042 | 1.1029015 | 0.7370245 |  | 0 | Inf | 0.505908 |  | 0.0561404 | 1.6642637 | 0.3798216 |  | 0.0649682 | 1.392834 | 0.4016189 |  | 0.0218978 | 0.9566202 | 0.9310122 |  | 0.0676259 | 1.4014946 | 0.5632446 |
| 0.2620181 | 1.2308644 | 0.4072445 |  | 0.6008202 | 1.1628572 | 0.6864248 |  | 0.0562201 | 1.8227593 | 0.2986195 |  | 0.6267829 | 1.6343183 | 0.1064835 |  | 0.0229192 | 1.1017436 | 0.8499116 |  | 0.0676259 | 1.5594787 | 0.445098 |
| 0.2961988 | 1.2857524 | 0.305703 |  | 0.0647292 | 1.0961827 | 0.7876193 |  | 0.0608365 | 1.9217324 | 0.2569389 |  | 0.137883 | 1.4990555 | 0.1851022 |  | 0.0269107 | 1.2770825 | 0.6323248 |  | 0.086478 | 1.8017613 | 0.3084614 |
| 0.0704989 | 2.0232979 | 0.119202 |  | 0.1082949 | 1.5799622 | 0.159632 |  | 0.0695876 | 2.0839736 | 0.2003925 |  | 0.15 | 1.233918 | 0.4610724 |  | 0.0272512 | 1.3494917 | 0.5571735 |  | 0.0874317 | 1.9366636 | 0.2511801 |
| 0.0497217 | Inf | 0.1243647 |  | 0.1713287 | 1.2007957 | 0.5128986 |  | 0.0699052 | 2.2646359 | 0.1518185 |  | 0.3030303 | 1.067924 | 0.8004046 |  | 0.0332963 | 1.4468467 | 0.4685287 |  | 0.0895009 | 2.1024318 | 0.1948948 |
| 0.3192194 | 1.3004325 | 0.2849023 |  | 0.0847826 | 1.2213714 | 0.541222 |  | 0.0718954 | 2.5195073 | 0.1024306 |  | 0.1141869 | 1.3676403 | 0.3068884 |  | 0.0341786 | 1.5604258 | 0.3813189 |  | 0.0902778 | 2.356764 | 0.1316293 |
| 0.1446374 | 1.1635865 | 0.6324723 |  | 0.1389794 | 1.217939 | 0.4989326 |  | 0.0754258 | 2.7012001 | 0.0773952 |  | 0.180536 | 1.1177443 | 0.6855222 |  | 0.0439024 | 1.3206874 | 0.5459861 |  | 0.0923521 | 1.8273539 | 0.2318155 |
| 0.2267243 | 1.2907966 | 0.3368672 |  | 0.5436028 | 1.0079368 | 0.9774599 |  | 0.0781032 | 2.9053693 | 0.0565155 |  | 0.357936 | 0.9722671 | 0.9107942 |  | 0.0449173 | 1.4238828 | 0.442073 |  | 0.0924856 | 1.991237 | 0.1699909 |
| 0.2507884 | 1.1741629 | 0.5248416 |  | 0.0940767 | 1.4044229 | 0.2981649 |  | 0.0783582 | 3.1325942 | 0.0398305 |  | 0.0410783 | 2.0120973 | 0.3168218 |  | 0.0480769 | 1.5398231 | 0.3464598 |  | 0.0975976 | 2.1582961 | 0.1234825 |
| 0.4553161 | 1.9698642 | 0.0208514 |  | 0.5739762 | 1.0921649 | 0.7880202 |  | 0.0815085 | 3.3242074 | 0.0296312 |  | 0.4771481 | 0.9401136 | 0.8029659 |  | 0.0486891 | 1.6623408 | 0.266181 |  | 0.1003289 | 2.2915895 | 0.0955711 |
| 0.0523104 | 3.3319508 | 0.2013986 |  | 0.0369048 | 1.2705642 | 0.6032579 |  | 0.0869033 | 2.5355533 | 0.0596148 |  | 0.0721925 | 1.3427863 | 0.4061033 |  | 0.0503356 | 1.8182531 | 0.1892315 |  | 0.1079882 | 2.464549 | 0.0683484 |
| 0.0630464 | 3.4027405 | 0.0674803 |  | 0.0554217 | 1.0263625 | 0.9446126 |  | 0.0893099 | 2.0712024 | 0.1070469 |  | 0.0514286 | 1.3969134 | 0.4671669 |  | 0.0504386 | 1.9778189 | 0.1324694 |  | 0.1084855 | 2.6109475 | 0.0514467 |
| 0.0382633 | Inf | 0.6058993 |  | 0.021789 | 0.9288418 | 0.88525 |  | 0.0896104 | 2.2367871 | 0.0732765 |  | 0.0286458 | 1.1000552 | 0.8934066 |  | 0.0537514 | 2.0657423 | 0.108656 |  | 0.1124088 | 2.6953421 | 0.0436994 |
| 0.0631224 | 3.7063163 | 0.0484593 |  | 0.0712644 | 1.1583258 | 0.6662195 |  | 0.091352 | 1.8403105 | 0.1451106 |  | 0.039604 | 1.7121786 | 0.4449756 |  | 0.056582 | 2.2051749 | 0.0790763 |  | 0.1143317 | 2.8611964 | 0.0316271 |
| 0.0502733 | 2.7359917 | 0.2938434 |  | 0.019037 | 0.8602129 | 0.7683551 |  | 0.0926999 | 1.9516471 | 0.109123 |  | 0.048718 | 1.3296932 | 0.5766041 |  | 0.0584862 | 1.8225709 | 0.1522088 |  | 0.1251647 | 2.3619205 | 0.0549555 |
| 0.184581 | 1.1629 | 0.6048181 |  | 0.5565159 | 0.940886 | 0.8385704 |  | 0.0939431 | 2.0651593 | 0.0812926 |  | 0.5852569 | 1.2166189 | 0.5232498 |  | 0.0623608 | 1.5898889 | 0.2391782 |  | 0.1260404 | 2.5363592 | 0.0366179 |
| 0.0957111 | 1.2787507 | 0.469704 |  | 0.0919037 | 1.3362454 | 0.3751248 |  | 0.097076 | 2.2098019 | 0.0554654 |  | 0.0792602 | 1.6614279 | 0.1496122 |  | 0.0666667 | 1.6674238 | 0.1934619 |  | 0.127907 | 2.6545272 | 0.0278022 |
| 0.194579 | 1.2123967 | 0.5088077 |  | 0.0917127 | 1.2838007 | 0.444985 |  | 0.0993464 | 2.3284402 | 0.0404873 |  | 0.0698795 | 1.3769324 | 0.3909175 |  | 0.0702576 | 1.7635029 | 0.148003 |  | 0.1294584 | 2.8004311 | 0.0197595 |
| 0.335054 | 1.4430053 | 0.135679 |  | 0.0338983 | 1.2110989 | 0.7078817 |  | 0.1029412 | 1.9723765 | 0.0810898 |  | 0.0578406 | 1.311691 | 0.522035 |  | 0.0765607 | 1.5893308 | 0.212616 |  | 0.1296296 | 2.9132914 | 0.0151645 |
| 0.2061462 | 1.193005 | 0.5279493 |  | 0.5809524 | 1.0962964 | 0.78737 |  | 0.1049305 | 2.0745528 | 0.0601441 |  | 0.5801922 | 1.0062714 | 0.983766 |  | 0.0847458 | 1.6664434 | 0.1686205 |  | 0.133995 | 3.1014687 | 0.0097013 |
| 0.2263211 | 1.244123 | 0.4114544 |  | 0.0628707 | 1.017806 | 0.9587224 |  | 0.1050725 | 1.8388493 | 0.0987314 |  | 0.1014493 | 1.3652586 | 0.3243398 |  | 0.0849257 | 1.7536891 | 0.1290432 |  | 0.1342383 | 2.6184695 | 0.0185578 |
| 0.043723 | Inf | 0.2736679 |  | 0.0012165 | 2.3794485 | 0.3711519 |  | 0.1053228 | 1.6218715 | 0.1708058 |  | 0.0210035 | 0.9651422 | 0.9602649 |  | 0.0867971 | 1.536528 | 0.2249967 |  | 0.1371429 | 2.7031241 | 0.0147686 |
| 0.4615398 | 1.9892432 | 0.0224051 |  | 0.535636 | 1.0631358 | 0.8208867 |  | 0.1078067 | 1.6753811 | 0.1434027 |  | 0.5332799 | 0.9528247 | 0.8501594 |  | 0.0869565 | 1.63379 | 0.16455 |  | 0.1373534 | 2.7889376 | 0.0117034 |
| 0.0486301 | Inf | 0.168664 |  | 0.0266667 | 1.1027922 | 0.8484149 |  | 0.1095541 | 1.7312571 | 0.1191517 |  | 0.0410959 | 2.3734291 | 0.2108034 |  | 0.0893008 | 1.7335578 | 0.1182298 |  | 0.1374622 | 2.9535097 | 0.0074395 |
| 0.1537335 | 1.1964988 | 0.5709838 |  | 0.5660777 | 1.0647055 | 0.8383777 |  | 0.1138498 | 1.8100933 | 0.0913306 |  | 0.5379845 | 0.9385128 | 0.8058718 |  | 0.0959233 | 1.8124405 | 0.090585 |  | 0.1405975 | 3.0311427 | 0.0060218 |
| 0.0731736 | 1.5312289 | 0.279404 |  | 0.0569196 | 0.9343127 | 0.8487151 |  | 0.1138498 | 1.8483928 | 0.0802166 |  | 0.0693878 | 1.2958196 | 0.487634 |  | 0.0992196 | 1.8703083 | 0.0743788 |  | 0.1412268 | 2.6203002 | 0.0116196 |
| 0.2427395 | 1.2283228 | 0.4231283 |  | 0 | Inf | 0.3138509 |  | 0.1167453 | 1.932734 | 0.0599651 |  | 0.0595238 | 1.5115644 | 0.3276181 |  | 0.1101512 | 1.6990377 | 0.1163579 |  | 0.1412742 | 2.7435247 | 0.0079608 |
| 0.0863992 | 1.3734863 | 0.370987 |  | 0.1443418 | 1.1786428 | 0.5646568 |  | 0.1175141 | 1.7188778 | 0.1083889 |  | 0.1324138 | 1.4242856 | 0.2478248 |  | 0.1164614 | 1.7749717 | 0.0884969 |  | 0.1428572 | 2.8589712 | 0.0055812 |
| 0.0610795 | 2.8653724 | 0.1218901 |  | 0.0365297 | 1.1471529 | 0.7660357 |  | 0.1178707 | 1.8143185 | 0.0766044 |  | 0.076129 | 1.595493 | 0.1856259 |  | 0.1178451 | 1.8719326 | 0.0619126 |  | 0.1470588 | 3.0113269 | 0.0034609 |
| 0.2162405 | 1.1914916 | 0.51653 |  | 0.1739606 | 1.2476362 | 0.42857 |  | 0.1189591 | 1.8670441 | 0.0631238 |  | 0.0730816 | 1.4177686 | 0.3243845 |  | 0.121853 | 1.9486816 | 0.0464761 |  | 0.151436 | 3.1370479 | 0.0023413 |
| 0.2023038 | 1.1368848 | 0.6529822 |  | 0.0183486 | 1.0173666 | 0.9765751 |  | 0.1270983 | 1.7073459 | 0.0995527 |  | 0.0648508 | 1.3181581 | 0.4850832 |  | 0.1251293 | 2.0344005 | 0.0335783 |  | 0.1585366 | 2.752268 | 0.0047641 |
| 0.0758826 | 1.4428322 | 0.3249359 |  | 0.6432052 | 1.7121007 | 0.1986298 |  | 0.1318124 | 1.5449206 | 0.1676351 |  | 0.8857716 | 1.2195433 | 0.7346323 |  | 0.1271989 | 2.1385507 | 0.0224412 |  | 0.1587097 | 2.8599882 | 0.0032939 |
| 0.215093 | 1.2041407 | 0.4985595 |  | 0.0597345 | 0.9947903 | 0.988302 |  | 0.1367989 | 1.5981247 | 0.1364413 |  | 0 | 1.0812463 | 0.9376972 |  | 0.1276794 | 1.9333021 | 0.040925 |  | 0.1632373 | 2.9629905 | 0.0023112 |
| 0.0921821 | 1.2235885 | 0.5533776 |  | 0.0510689 | 0.9610862 | 0.9155981 |  | 0.1387808 | 1.6367095 | 0.1172681 |  | 0.0949936 | 1.5687782 | 0.1829685 |  | 0.1383442 | 1.7791984 | 0.0657561 |  | 0.1657754 | 2.6020616 | 0.0052816 |
| 0.2774479 | 1.3357534 | 0.2422842 |  | 0.3705986 | 0.829711 | 0.4472712 |  | 0.1441861 | 1.5192498 | 0.1717317 |  | 0.5814286 | 1.0729268 | 0.8189089 |  | 0.1423186 | 1.8403162 | 0.0510553 |  | 0.1751969 | 2.7293501 | 0.0032624 |
| 0.171373 | 1.1317948 | 0.6788328 |  | 0.5522491 | 1.0151154 | 0.9580648 |  | 0.1545779 | 1.5839778 | 0.1322816 |  | 0.5410959 | 0.9117502 | 0.7272916 |  | 0.1733333 | 1.7149649 | 0.076358 |  | 0.1754386 | 2.4737234 | 0.0059517 |
| 0.3765305 | 1.9378732 | 0.0081708 |  | 0.0976395 | 1.5332138 | 0.189303 |  | 0.1608187 | 1.650264 | 0.100591 |  | 0.0579151 | 1.4015415 | 0.4248445 |  | 0.1933702 | 1.5963098 | 0.1155085 |  | 0.1801926 | 2.5561367 | 0.0042802 |
| 0.3724222 | 1.6447881 | 0.048518 |  | 0.0616062 | 1.1087742 | 0.7718638 |  | 0.1666667 | 1.6935982 | 0.0838292 |  | 0.0498132 | 1.1786013 | 0.7217216 |  | 0.1942517 | 1.6511077 | 0.0910631 |  | 0.1824908 | 2.6525326 | 0.0029018 |
| 0.3646718 | 1.6827072 | 0.037337 |  | 0.5296524 | 0.9403466 | 0.819832 |  | 0.1680396 | 1.7754705 | 0.058996 |  | 0.4634896 | 0.9676429 | 0.8939134 |  | 0.2068607 | 1.7133196 | 0.0691304 |  | 0.1875 | 2.7090019 | 0.0023116 |
| 0.3736325 | 1.691037 | 0.0370636 |  | 0.0609613 | 1.039707 | 0.9129479 |  | 0.1757076 | 1.8292027 | 0.0466782 |  | 0.0664112 | 1.4535004 | 0.3431769 |  | 0.2094718 | 1.7655393 | 0.0546726 |  | 0.1879022 | 2.7748635 | 0.00177 |
| 0.0769784 | 1.3020067 | 0.457488 |  | 0.0493976 | 1.1052862 | 0.8007991 |  | 0.1778742 | 1.8979127 | 0.0344556 |  | 0.0950061 | 1.4380894 | 0.2656365 |  | 0.2265967 | 1.6369357 | 0.088965 |  | 0.1924119 | 2.5286694 | 0.0033768 |
| 0.3000007 | 1.3391523 | 0.2333378 |  | 0.0380368 | 1.4193618 | 0.4457552 |  | 0.1785714 | 1.7760756 | 0.0522013 |  | 0.0314286 | 1.4418868 | 0.6055055 |  | 0.2402496 | 1.6946945 | 0.0682298 |  | 0.1924198 | 2.6434021 | 0.0020439 |
| 0.1057482 | 1.3635697 | 0.3612349 |  | 0.0846325 | 1.1455596 | 0.6784697 |  | 0.185438 | 1.8141507 | 0.0438873 |  | 0.0870098 | 1.7628699 | 0.1067195 |  | 0.2412523 | 1.6025747 | 0.0963877 |  | 0.1944445 | 2.76173 | 0.0012086 |
| 0.0709482 | 1.7535249 | 0.1805932 |  | 0.0167959 | 1.4120032 | 0.6265005 |  | 0.1857283 | 1.8736924 | 0.0333363 |  | 0.0716216 | 1.2655129 | 0.5073885 |  | 0.2540984 | 1.4879255 | 0.1541961 |  | 0.2007823 | 2.5616465 | 0.0020545 |
| 0.2237738 | 1.2534548 | 0.402429 |  | 0.5489131 | 1.0698292 | 0.8092781 |  | 0.1862891 | 1.9191542 | 0.0269526 |  | 0.5904217 | 1.2520004 | 0.4640996 |  | 0.2742358 | 1.534335 | 0.1243549 |  | 0.201669 | 2.6062018 | 0.0016762 |
| 0.1296239 | 1.2214258 | 0.5415037 |  | 0.0816568 | 1.0715999 | 0.8330597 |  | 0.1907984 | 1.9593018 | 0.0223036 |  | 0.1103118 | 1.2403661 | 0.4829956 |  | 0.2745735 | 1.5817686 | 0.099333 |  | 0.212548 | 2.3660964 | 0.003834 |
| 0.0568401 | 4.4221393 | 0.1035997 |  | 0.5631006 | 1.0333844 | 0.9149497 |  | 0.1914415 | 2.046608 | 0.0147071 |  | 0.5354391 | 0.9806993 | 0.9392433 |  | 0.280271 | 1.6191979 | 0.082988 |  | 0.227577 | 2.434262 | 0.0027654 |
| 0.4099154 | 1.7773046 | 0.0339638 |  | 0 | 2.0143282 | 0.4748627 |  | 0.1928307 | 2.1056588 | 0.0110556 |  | 0.0493333 | 1.0627965 | 0.8950707 |  | 0.2897787 | 1.6788963 | 0.0619312 |  | 0.2345014 | 2.2278759 | 0.0059246 |
| 0.3160156 | 1.3153907 | 0.2637375 |  | 0.5731225 | 0.9176416 | 0.793129 |  | 0.196 | 2.1831607 | 0.0075808 |  | 0.5372414 | 0.9196857 | 0.7458331 |  | 0.2913645 | 1.5765419 | 0.0958858 |  | 0.2394366 | 2.046047 | 0.0121746 |
| 0.3049236 | 1.373062 | 0.1954652 |  | 0 | Inf | 0.2308887 |  | 0.2009569 | 2.057067 | 0.0117854 |  | 0 | 0.7876874 | 0.7370528 |  | 0.2932892 | 1.5097286 | 0.1262605 |  | 0.2431762 | 2.099847 | 0.0092739 |
| 0.2655794 | 1.2816413 | 0.3218847 |  | 0.5304348 | 0.9863208 | 0.9593615 |  | 0.2022472 | 1.9341084 | 0.0189579 |  | 0.9190372 | 0.6983541 | 0.7181856 |  | 0.2950687 | 1.4244013 | 0.1836884 |  | 0.2434018 | 2.1901166 | 0.0058002 |
| 0.2069846 | 1.13507 | 0.6447197 |  | 0.2111675 | 1.0483391 | 0.8559126 |  | 0.2079439 | 2.016911 | 0.0123585 |  | 0.4388762 | 0.9334641 | 0.7792841 |  | 0.3015215 | 1.3306105 | 0.2777504 |  | 0.2524272 | 2.062876 | 0.0094484 |
| 0.2299542 | 1.1629553 | 0.5610093 |  | 0.1410106 | 1.1334227 | 0.6608896 |  | 0.2149759 | 2.1025402 | 0.0078686 |  | 0.3631022 | 0.9534699 | 0.8485642 |  | 0.3183183 | 1.2494103 | 0.3927283 |  | 0.2635009 | 1.9219266 | 0.0173657 |
| 0.3388172 | 1.5401614 | 0.0782616 |  | 0.5738007 | 1.039519 | 0.9059527 |  | 0.2168397 | 1.961832 | 0.0143827 |  | 0.5506458 | 0.7689354 | 0.3523677 |  | 0.3185619 | 1.2780467 | 0.346158 |  | 0.2706156 | 1.9848162 | 0.012414 |
| 0.0667819 | 1.7979143 | 0.1974164 |  | 0.5621693 | 0.9431668 | 0.8491067 |  | 0.2199488 | 2.0277899 | 0.0101012 |  | 0.5524476 | 0.8284498 | 0.5065209 |  | 0.336255 | 1.3237741 | 0.2810573 |  | 0.2949367 | 2.0683447 | 0.0078315 |
| 0.2258105 | 1.3102367 | 0.3162688 |  | 0.5736434 | 0.9831494 | 0.958689 |  | 0.2208589 | 2.0833596 | 0.0074712 |  | 0.5635567 | 0.9999797 | 0.9999432 |  | 0.3366834 | 1.2557992 | 0.3770872 |  | 0.2959538 | 2.1548265 | 0.0048108 |
| 0.2519772 | 1.1575887 | 0.559704 |  | 0.5187914 | 0.9422286 | 0.8209059 |  | 0.2216749 | 1.9450653 | 0.0139697 |  | 0.5665339 | 0.9619445 | 0.8966749 |  | 0.3382473 | 1.2038952 | 0.4680969 |  | 0.2969697 | 2.2444211 | 0.002873 |
| 0.2954865 | 1.19661 | 0.4651899 |  | 0.3449304 | 0.7529298 | 0.2467558 |  | 0.2237522 | 2.0260352 | 0.0088951 |  | 0.2376374 | 1.032381 | 0.9048597 |  | 0.3427091 | 1.2464046 | 0.3887796 |  | 0.3050368 | 2.0787434 | 0.006259 |
| 0.3359293 | 1.4881831 | 0.105457 |  | 0.5290541 | 0.920075 | 0.7577191 |  | 0.224261 | 1.8805922 | 0.0178838 |  | 0.4797342 | 0.9932202 | 0.9780608 |  | 0.3442623 | 1.1844417 | 0.5048354 |  | 0.3076063 | 2.1389445 | 0.0044434 |
| 0.3554069 | 1.6433248 | 0.0455649 |  | 0.5536508 | 0.9472568 | 0.8526132 |  | 0.2260536 | 1.791655 | 0.0269176 |  | 0.564344 | 0.8687439 | 0.6370447 |  | 0.3493056 | 1.1114171 | 0.6754797 |  | 0.3137045 | 2.0062302 | 0.0083665 |
| 0.2060215 | 1.1365222 | 0.6473283 |  | 0.1780538 | 1.1964991 | 0.5136641 |  | 0.2301496 | 1.8508226 | 0.0193043 |  | 0 | 0.6026102 | 0.6084526 |  | 0.3593509 | 1.1503751 | 0.5786011 |  | 0.3177778 | 1.9238836 | 0.0121302 |
| 0.2196651 | 1.2311969 | 0.4409592 |  | 0.6261468 | 1.5412629 | 0.270643 |  | 0.239521 | 1.9150185 | 0.0133774 |  | 0.6365957 | 1.6805351 | 0.0973573 |  | 0.3655084 | 1.1063023 | 0.6872065 |  | 0.3211611 | 1.9810693 | 0.0086813 |
| 0.2509706 | 1.111202 | 0.6742896 |  | 0.5697594 | 0.9788554 | 0.9462383 |  | 0.2435345 | 1.7999872 | 0.0238789 |  | 0.8607143 | 1.4264825 | 0.4005827 |  | 0.367597 | 1.0506688 | 0.8431906 |  | 0.3254282 | 1.8619388 | 0.01599 |
| 0.2482548 | 1.133927 | 0.6187321 |  | 0.4746515 | 0.8424335 | 0.4968987 |  | 0.2505568 | 1.8590838 | 0.0169839 |  | 0.4631656 | 0.9497122 | 0.8343134 |  | 0.3690608 | 0.9969537 | 0.9902253 |  | 0.3261105 | 1.7530347 | 0.0282133 |
| 0.3396421 | 1.6107087 | 0.0513395 |  | 0.5318215 | 1.0355282 | 0.8972878 |  | 0.2714127 | 1.7664222 | 0.0271241 |  | 0.5404645 | 0.9557764 | 0.8627529 |  | 0.3776388 | 0.9569157 | 0.8592663 |  | 0.3361946 | 1.8249185 | 0.0183141 |
| 0.1596619 | 1.1522312 | 0.6446524 |  | 0.5987549 | 1.086996 | 0.8235709 |  | 0.2716279 | 1.795532 | 0.022926 |  | 0 | Inf | 0.5229707 |  | 0.3852398 | 0.921096 | 0.7402552 |  | 0.3375143 | 1.7269104 | 0.0308523 |
| 0.4184352 | 1.9746349 | 0.0116395 |  | 0.4261364 | 0.9286669 | 0.763714 |  | 0.2806005 | 1.6945909 | 0.0389316 |  | 0.0501567 | 1.2922024 | 0.5778491 |  | 0.3869908 | 0.9513663 | 0.8406366 |  | 0.3441911 | 1.7815355 | 0.022322 |
| 0.066055 | 1.6406525 | 0.2787129 |  | 0.1528384 | 1.1157636 | 0.6955367 |  | 0.2838847 | 1.7640148 | 0.0259354 |  | 0.6843712 | 1.5270047 | 0.2099753 |  | 0.3899148 | 0.9107932 | 0.7060398 |  | 0.3516767 | 1.7025896 | 0.033999 |
| 0.2414114 | 1.1855639 | 0.5075132 |  | 0.506156 | 0.8195318 | 0.4482262 |  | 0.2956752 | 1.8142384 | 0.0192639 |  | 0.5496403 | 0.7864759 | 0.3864365 |  | 0.3904473 | 0.9395354 | 0.8012273 |  | 0.3646907 | 1.6300242 | 0.0501942 |
| 0.0688782 | 1.9339084 | 0.1457642 |  | 0.4130758 | 0.8655932 | 0.556894 |  | 0.2972689 | 1.8714185 | 0.0136626 |  | 0.4442725 | 1.0178839 | 0.9424626 |  | 0.3921863 | 0.9719399 | 0.9085401 |  | 0.368524 | 1.6863378 | 0.0359778 |
| 0.4093089 | 1.9016755 | 0.0156335 |  | 0.5623664 | 0.9909777 | 0.9764918 |  | 0.2987288 | 1.8070217 | 0.0190291 |  | 0.518364 | 0.8784095 | 0.612487 |  | 0.394818 | 0.9192379 | 0.7339928 |  | 0.3710247 | 1.7417452 | 0.0257681 |
| 0.2910943 | 1.2707128 | 0.3295847 |  | 0.488604 | 0.8414059 | 0.4975445 |  | 0.3020833 | 1.8812266 | 0.0120358 |  | 0.5 | 0.9463277 | 0.8252185 |  | 0.3994528 | 0.8771977 | 0.5973426 |  | 0.3762162 | 1.7793839 | 0.0204793 |
| 0.422576 | 1.7516667 | 0.0468096 |  | 0.4562712 | 0.9320874 | 0.7768188 |  | 0.3109244 | 1.9463912 | 0.0080165 |  | 0.4736842 | 0.9151584 | 0.7202132 |  | 0.406639 | 0.903015 | 0.6808857 |  | 0.3762765 | 1.6793635 | 0.0363087 |
| 0.3105615 | 1.3939953 | 0.1745755 |  | 0.2806692 | 0.8874181 | 0.6341185 |  | 0.3132911 | 1.8382276 | 0.0149054 |  | 0.3039648 | 1.0015034 | 0.995341 |  | 0.409901 | 0.9265524 | 0.7584386 |  | 0.3813906 | 1.5811556 | 0.0634023 |
| 0.1538466 | 1.2489603 | 0.4822577 |  | 0.5442393 | 1.0472045 | 0.8690224 |  | 0.3162791 | 1.7456596 | 0.0253051 |  | 0.4305085 | 0.878318 | 0.5971709 |  | 0.4166667 | 0.8892018 | 0.6365754 |  | 0.3864959 | 1.6281187 | 0.0480565 |
| 0.0594961 | 2.4935268 | 0.1844513 |  | 0.1922705 | 1.1087786 | 0.6984572 |  | 0.3188559 | 1.8178754 | 0.0161273 |  | 0.148429 | 1.2010821 | 0.5207011 |  | 0.4208955 | 0.8421704 | 0.4906792 |  | 0.3877755 | 1.5389379 | 0.0796224 |
| 0.3708023 | 1.5782471 | 0.0708858 |  | 0.479661 | 0.7899196 | 0.3534486 |  | 0.325603 | 1.8672645 | 0.0118335 |  | 0.3678832 | 0.8962692 | 0.6590653 |  | 0.4226268 | 0.8662013 | 0.5644286 |  | 0.3975449 | 1.4473503 | 0.1320472 |
| 0.3406385 | 1.5821949 | 0.0619422 |  | 0.5226986 | 0.9771475 | 0.9299158 |  | 0.326087 | 1.9167446 | 0.008642 |  | 0.5 | 0.851296 | 0.5249456 |  | 0.4227799 | 0.894659 | 0.6552348 |  | 0.404936 | 1.495197 | 0.1010145 |
| 0.256812 | 1.1981657 | 0.4709712 |  | 0.6012918 | 1.3480697 | 0.4227509 |  | 0.3361345 | 1.9596914 | 0.0065629 |  | 0.6016082 | 1.4023476 | 0.2692898 |  | 0.4271117 | 0.9118134 | 0.7111354 |  | 0.4085405 | 1.54738 | 0.0747748 |
| 0.2373653 | 1.2036181 | 0.475247 |  | 0.4556301 | 0.9855308 | 0.952985 |  | 0.3392358 | 1.8542592 | 0.0123925 |  | 0.4387097 | 0.9693458 | 0.8990996 |  | 0.430727 | 0.9293234 | 0.7687098 |  | 0.4086022 | 1.5988872 | 0.0551588 |
| 0.058526 | 4.9422237 | 0.0761163 |  | 0.2062561 | 1.094542 | 0.7312657 |  | 0.3405495 | 1.908407 | 0.0087636 |  | 0.159864 | 1.1821276 | 0.5497115 |  | 0.4344381 | 0.9616701 | 0.8754199 |  | 0.4145749 | 1.6454945 | 0.0416439 |
| 0.3512695 | 1.6869264 | 0.033972 |  | 0.2847328 | 0.89516 | 0.6570443 |  | 0.3405546 | 1.9515716 | 0.0066289 |  | 0.2198002 | 1.146359 | 0.6191639 |  | 0.4385321 | 0.9877794 | 0.9606525 |  | 0.4203297 | 1.6817451 | 0.0333589 |
| 0.2835447 | 1.3079655 | 0.2751011 |  | 0.4405026 | 0.9456143 | 0.8205768 |  | 0.3410257 | 1.8593131 | 0.0116471 |  | 0.4786656 | 0.9651238 | 0.8859294 |  | 0.4460064 | 0.9394788 | 0.8030132 |  | 0.4216614 | 1.7270232 | 0.0251698 |
| 0.4106137 | 1.866853 | 0.0210273 |  | 0.3025362 | 0.8942627 | 0.6524662 |  | 0.3453427 | 1.9161068 | 0.0080697 |  | 0.2766374 | 1.0019129 | 0.9941364 |  | 0.4467822 | 0.8818998 | 0.6173295 |  | 0.4343348 | 1.7779684 | 0.0182317 |
| 0.3857978 | 1.899245 | 0.0111704 |  | 0.2621107 | 0.9139799 | 0.7219966 |  | 0.3516187 | 1.8578348 | 0.0114781 |  | 0.3559929 | 0.9381572 | 0.7992254 |  | 0.4513049 | 0.9074688 | 0.6994665 |  | 0.4388889 | 1.6907877 | 0.0311312 |
| 0.1754019 | 1.0639456 | 0.8317848 |  | 0.5762521 | 1.0121418 | 0.9717458 |  | 0.3572102 | 1.7510032 | 0.022318 |  | 0.5693069 | 0.9015397 | 0.7354957 |  | 0.4529792 | 0.9323351 | 0.7805422 |  | 0.4430715 | 1.6222149 | 0.0470854 |
| 0.2692767 | 1.2009028 | 0.4605803 |  | 0.5232178 | 0.9440936 | 0.8289182 |  | 0.3572621 | 1.8145679 | 0.0149162 |  | 0.5420431 | 0.8791632 | 0.6316863 |  | 0.4542816 | 0.9533466 | 0.8492816 |  | 0.444666 | 1.5775061 | 0.0614367 |
| 0.324059 | 1.328261 | 0.2490564 |  | 0.3381226 | 0.8417306 | 0.4841301 |  | 0.3598214 | 1.728777 | 0.0254637 |  | 0.43446 | 0.9385432 | 0.7961865 |  | 0.4550265 | 0.9855175 | 0.9537232 |  | 0.4456424 | 1.6318894 | 0.0442283 |
| 0.2152027 | 1.1484959 | 0.6083495 |  | 0.1853403 | 1.1412819 | 0.6250106 |  | 0.3649789 | 1.7691579 | 0.0197558 |  | 0.3197729 | 0.9320769 | 0.7807651 |  | 0.4576271 | 1.0189777 | 0.9403717 |  | 0.4501689 | 1.5748043 | 0.0624807 |
| 0.2729605 | 1.2832381 | 0.3142081 |  | 0.4163726 | 0.9002036 | 0.6693085 |  | 0.3666987 | 1.7009827 | 0.03019 |  | 0.3271719 | 0.9665533 | 0.8929471 |  | 0.4641446 | 1.0492619 | 0.8481856 |  | 0.4536326 | 1.6327694 | 0.0440153 |
| 0.2776753 | 1.3062007 | 0.2789222 |  | 0.4623976 | 0.8663487 | 0.5672804 |  | 0.3731976 | 1.6685808 | 0.0368582 |  | 0.5178571 | 0.8490502 | 0.5225359 |  | 0.4738237 | 1.0944838 | 0.7196121 |  | 0.4646018 | 1.6028915 | 0.0528 |
| 0.402432 | 1.8430082 | 0.0198236 |  | 0.4150685 | 0.870145 | 0.5718947 |  | 0.3955501 | 1.5879047 | 0.0603162 |  | 0.6354167 | 1.5702826 | 0.1508327 |  | 0.4745025 | 1.0360726 | 0.8887052 |  | 0.4649185 | 1.5510783 | 0.0725191 |
| 0.2274256 | 1.2332851 | 0.4244268 |  | 0.1974585 | 1.0606404 | 0.8229465 |  | 0.4034286 | 1.6390933 | 0.0444497 |  | 0.2397043 | 0.9882273 | 0.9641005 |  | 0.4804612 | 1.0812911 | 0.7578433 |  | 0.47981 | 1.4963394 | 0.1006147 |
| 0.3185631 | 1.2473184 | 0.3691468 |  | 0.4518623 | 0.9539507 | 0.8487633 |  | 0.4133127 | 1.5458067 | 0.0778963 |  | 0.5 | 0.8948579 | 0.6585957 |  | 0.4807163 | 1.0477281 | 0.8551775 |  | 0.4949187 | 1.4186698 | 0.1566017 |
| 0.0748804 | 1.3633977 | 0.4059654 |  | 0.5037083 | 0.8276583 | 0.4659774 |  | 0.4186747 | 1.5783743 | 0.0644899 |  | 0.5503641 | 0.7410628 | 0.2886234 |  | 0.4810441 | 0.9837221 | 0.9492329 |  | 0.4952 | 1.3596202 | 0.2161969 |
| 0.0560004 | 3.9386498 | 0.1386016 |  | 0.3524937 | 0.779522 | 0.3097636 |  | 0.4249605 | 1.6391095 | 0.0450175 |  | 0.3986195 | 0.8827977 | 0.612997 |  | 0.4828018 | 1.0276188 | 0.9159119 |  | 0.5 | 1.4121146 | 0.164348 |
| 0.2959553 | 1.2347055 | 0.3907263 |  | 0.2613334 | 0.9638861 | 0.885274 |  | 0.4369478 | 1.7029891 | 0.0305412 |  | 0.2862385 | 1.0371287 | 0.8884916 |  | 0.4838906 | 0.9796393 | 0.937091 |  | 0.5020243 | 1.4626373 | 0.1250785 |
| 0.0648151 | 1.9805485 | 0.1735489 |  | 0.5283019 | 0.8903902 | 0.6672595 |  | 0.4477504 | 1.6109443 | 0.0541258 |  | 0.4459177 | 0.9692433 | 0.8989695 |  | 0.4838926 | 0.9232782 | 0.7619923 |  | 0.5188968 | 1.3924545 | 0.1850493 |
| 0.3985068 | 1.8977704 | 0.0132364 |  | 0.5113924 | 0.8434189 | 0.5164911 |  | 0.4512894 | 1.6715005 | 0.0377201 |  | 0.601339 | 1.3145723 | 0.3724121 |  | 0.4845631 | 0.9569091 | 0.8672731 |  | 0.5196734 | 1.4356791 | 0.1473479 |
| 0.2444911 | 1.2627141 | 0.3632429 |  | 0.4691445 | 0.8901795 | 0.6427791 |  | 0.4518349 | 1.5877287 | 0.0632451 |  | 0.522069 | 0.9312171 | 0.7806139 |  | 0.4880876 | 0.9908595 | 0.9722006 |  | 0.5197421 | 1.4807573 | 0.115405 |
| 0.4969544 | 1.608833 | 0.1769149 |  | 0.5600506 | 0.8886767 | 0.7008391 |  | 0.4554217 | 1.5154745 | 0.0972845 |  | 0.6668581 | 1.6194365 | 0.1372477 |  | 0.4923274 | 0.9653878 | 0.8951065 |  | 0.5204318 | 1.3990755 | 0.1818892 |
| 0.479423 | 1.6262172 | 0.1490449 |  | 0.125 | 1.3191303 | 0.3663619 |  | 0.4750357 | 1.5739171 | 0.0700709 |  | 0.3918605 | 0.852687 | 0.5177293 |  | 0.5 | 1.0020172 | 0.9939806 |  | 0.5231677 | 1.3330604 | 0.2576319 |
| 0.2039182 | 1.186338 | 0.5491338 |  | 0.1319108 | 1.299715 | 0.3797796 |  | 0.4759166 | 1.6355499 | 0.0490907 |  | 0.3804255 | 0.8937855 | 0.6496699 |  | 0.5 | 0.9454759 | 0.8360588 |  | 0.5329949 | 1.3879552 | 0.1962948 |
| 0.347765 | 1.5641393 | 0.0703358 |  | 0.2628205 | 0.9430926 | 0.8167343 |  | 0.4761905 | 1.6920933 | 0.0351381 |  | 0.2267207 | 1.1861718 | 0.534203 |  | 0.5 | 0.9754124 | 0.9267769 |  | 0.5367868 | 1.4376427 | 0.1520681 |
| 0.5603804 | 1.5435751 | 0.2685737 |  | 0.7647498 | 1.5001764 | 0.6815952 |  | 0.4779006 | 1.7641377 | 0.0227155 |  | 0.8894118 | 0.8381099 | 0.8040079 |  | 0.5 | 0.9976039 | 0.9929331 |  | 0.5370588 | 1.3559009 | 0.2347632 |
| 0.3414202 | 1.5122926 | 0.0946402 |  | 0.397882 | 0.8188095 | 0.415558 |  | 0.4871448 | 1.6667692 | 0.0422137 |  | 0.487013 | 0.9656265 | 0.888045 |  | 0.5 | 0.947059 | 0.843278 |  | 0.5454546 | 1.2911908 | 0.3242829 |
| 0.1704596 | 1.2063654 | 0.5412502 |  | 0.5866279 | 1.3379879 | 0.3913061 |  | 0.4967696 | 1.5837595 | 0.0702509 |  | 0.5798742 | 0.9460106 | 0.8564663 |  | 0.5 | 0.9690278 | 0.9089386 |  | 0.5497703 | 1.3439726 | 0.2537933 |
| 0.4558587 | 1.8871627 | 0.0355801 |  | 0.5395377 | 0.9648766 | 0.898322 |  | 0.5 | 1.5269951 | 0.0990347 |  | 0.4193284 | 0.8654539 | 0.5563106 |  | 0.5 | 0.9886065 | 0.9667624 |  | 0.5500388 | 1.2878657 | 0.3349689 |
| 0.4325109 | 1.9055091 | 0.0246628 |  | 0.5172414 | 0.9011231 | 0.691721 |  | 0.5 | 1.4389694 | 0.1612039 |  | 0.4224138 | 0.8530096 | 0.5172261 |  | 0.5057471 | 1.0392303 | 0.8888391 |  | 0.5566038 | 1.3351641 | 0.2702237 |
| 0.0403145 | Inf | 0.3609454 |  | 0.5052697 | 0.8580929 | 0.5554669 |  | 0.5 | 1.3796319 | 0.2212037 |  | 0.4090909 | 0.9442066 | 0.8158526 |  | 0.5078788 | 1.0746681 | 0.7935554 |  | 0.5660091 | 1.3955317 | 0.2031475 |
| 0.2898594 | 1.2437707 | 0.3748482 |  | 0.2309237 | 0.9917894 | 0.9744396 |  | 0.5 | 1.4160592 | 0.1856872 |  | 0.2497286 | 0.970691 | 0.9089354 |  | 0.5100984 | 1.1319345 | 0.6526322 |  | 0.5736738 | 1.3192861 | 0.2971207 |
| 0.2378335 | 1.2400411 | 0.406908 |  | 0.4422082 | 0.9727716 | 0.91084 |  | 0.5071885 | 1.4664652 | 0.1447881 |  | 0.5216159 | 0.9051029 | 0.6968283 |  | 0.5107487 | 1.0562325 | 0.84532 |  | 0.5778816 | 1.3700966 | 0.2356182 |
| 0.3233295 | 1.2835893 | 0.3110656 |  | 0.4590818 | 0.886523 | 0.6288265 |  | 0.5139706 | 1.5229683 | 0.1086354 |  | 0.5638686 | 0.9347432 | 0.8167555 |  | 0.5137363 | 1.1142972 | 0.6996561 |  | 0.5783212 | 1.2955637 | 0.3371744 |
| 0.3935434 | 1.8216192 | 0.0206538 |  | 0.4368351 | 0.9731718 | 0.9120346 |  | 0.5162963 | 1.5893312 | 0.0767654 |  | 0.4393491 | 0.9509588 | 0.8378254 |  | 0.5140128 | 1.1552287 | 0.6067688 |  | 0.5831134 | 1.3290062 | 0.2915181 |
| 0.4867876 | 1.784022 | 0.0845146 |  | 0.3816176 | 0.8572207 | 0.5307055 |  | 0.5174954 | 1.6532764 | 0.0543784 |  | 0.5383523 | 0.9724691 | 0.9138895 |  | 0.5145511 | 1.2218747 | 0.4746402 |  | 0.592006 | 1.3904066 | 0.2210982 |
| 0.3499024 | 1.6445505 | 0.0438568 |  | 0.35958 | 0.7966376 | 0.35396 |  | 0.5175613 | 1.7518613 | 0.0315136 |  | 0.3499044 | 0.9886973 | 0.9641317 |  | 0.5158988 | 1.2604439 | 0.4085861 |  | 0.5972138 | 1.4333987 | 0.1809332 |
| 0.430361 | 1.7967403 | 0.0418166 |  | 0.4904502 | 0.870042 | 0.5845953 |  | 0.5188133 | 1.8424484 | 0.0187948 |  | 0.4060721 | 0.9122785 | 0.7095535 |  | 0.5186567 | 1.2000397 | 0.5235538 |  | 0.6 | 1.5025244 | 0.1297427 |
| 0.4078626 | 1.801494 | 0.0272666 |  | 0.2858509 | 0.8683544 | 0.5694443 |  | 0.5248447 | 1.7324999 | 0.0375608 |  | 0.3077609 | 0.9691868 | 0.9022626 |  | 0.5242038 | 1.2511956 | 0.4326648 |  | 0.6015385 | 1.4596609 | 0.16652 |
| 0.3902065 | 1.888 | 0.0129062 |  | 0.1918736 | 1.1841029 | 0.5317779 |  | 0.5365118 | 1.6880454 | 0.0510937 |  | 0.4583002 | 1.0012079 | 0.9960845 |  | 0.5245692 | 1.2931853 | 0.3675636 |  | 0.6044892 | 1.534119 | 0.116836 |
| 0.0613487 | 3.131972 | 0.0908408 |  | 0.4364821 | 0.9552593 | 0.8524979 |  | 0.5369967 | 1.6257839 | 0.0751978 |  | 0.6113989 | 1.4831783 | 0.1969944 |  | 0.5276039 | 1.3769313 | 0.2618475 |  | 0.6061856 | 1.6043135 | 0.0826733 |
| 0.0634549 | 2.6001063 | 0.0905255 |  | 0.1316372 | 1.2434412 | 0.4657547 |  | 0.5370844 | 1.549306 | 0.1160303 |  | 0.1388565 | 1.4102105 | 0.248425 |  | 0.5276324 | 1.450616 | 0.1912485 |  | 0.6085526 | 1.5475411 | 0.1158118 |
| 0.4681672 | 1.872532 | 0.0440421 |  | 0.3181035 | 0.8142035 | 0.4036592 |  | 0.5522479 | 1.4630241 | 0.1813544 |  | 0.5 | 0.8703483 | 0.5834298 |  | 0.5283843 | 1.3471746 | 0.3067458 |  | 0.620276 | 1.4630504 | 0.1800458 |
| 0.3552769 | 1.7273406 | 0.0265309 |  | 0.6008454 | 1.225151 | 0.5864084 |  | 0.5588578 | 1.5413771 | 0.1278564 |  | 0.6200772 | 1.5442937 | 0.1542905 |  | 0.5391892 | 1.2393947 | 0.4733434 |  | 0.6309795 | 1.5125711 | 0.144394 |
| 0.3741744 | 1.8633916 | 0.0130177 |  | 0.4861286 | 0.8230989 | 0.4443036 |  | 0.5616698 | 1.4211671 | 0.2275152 |  | 0.5529172 | 0.8709179 | 0.6265384 |  | 0.5426471 | 1.2943319 | 0.3881774 |  | 0.6476399 | 1.6226462 | 0.0869985 |
| 0.3562753 | 1.7133238 | 0.0298934 |  | 0.4498919 | 1.0065443 | 0.9788914 |  | 0.5622838 | 1.319999 | 0.3531564 |  | 0.4307446 | 0.908704 | 0.696639 |  | 0.5455581 | 1.3398783 | 0.3272532 |  | 0.6493084 | 1.7266804 | 0.0528423 |
| 0.420011 | 1.8762625 | 0.0223164 |  | 0.3033419 | 0.8529244 | 0.5196155 |  | 0.5667656 | 1.3868463 | 0.273376 |  | 0.4155955 | 0.900851 | 0.6712002 |  | 0.547619 | 1.4190062 | 0.2405382 |  | 0.6584127 | 1.6307589 | 0.0907835 |
| 0.3340421 | 1.4051425 | 0.1666502 |  | 0.495114 | 0.9014197 | 0.6837006 |  | 0.5761155 | 1.3132323 | 0.3749607 |  | 0.4397824 | 0.9838308 | 0.9470927 |  | 0.552899 | 1.5062616 | 0.1686518 |  | 0.6727941 | 1.7423289 | 0.0541437 |
| 0.4771735 | 1.7509263 | 0.0832109 |  | 0.2832264 | 0.8752452 | 0.5931796 |  | 0.5841925 | 1.3949399 | 0.2777242 |  | 0.5469613 | 0.8290285 | 0.4918239 |  | 0.5534967 | 1.6083272 | 0.109478 |  | 0.6798603 | 1.641972 | 0.0941865 |
| 0.4233194 | 1.684762 | 0.0708633 |  | 0.5357847 | 1.0155942 | 0.9551037 |  | 0.5869981 | 1.4906638 | 0.1920755 |  | 0.3720524 | 0.8630614 | 0.5512136 |  | 0.5560579 | 1.4997815 | 0.1850639 |  | 0.6812689 | 1.5712826 | 0.1384194 |
| 0.340458 | 1.5252591 | 0.0863031 |  | 0.4395604 | 0.9213836 | 0.7398395 |  | 0.5905263 | 1.3590606 | 0.3320948 |  | 0.2279746 | 1.1089248 | 0.7022435 |  | 0.5560942 | 1.4384323 | 0.2492431 |  | 0.6974212 | 1.4446102 | 0.24345 |
| 0.2695428 | 1.2403764 | 0.3850039 |  | 0.5833333 | 1.241919 | 0.5242387 |  | 0.5923322 | 1.2703754 | 0.4651983 |  | 0.3619048 | 1.0056035 | 0.9822398 |  | 0.5741864 | 1.5474057 | 0.1654573 |  | 0.6988177 | 1.5504721 | 0.1632969 |
| 0.3219015 | 1.3475382 | 0.2242068 |  | 0.622871 | 1.3897241 | 0.4038686 |  | 0.5960419 | 1.1361893 | 0.7081377 |  | 0.2494577 | 1.0272322 | 0.9186724 |  | 0.5763508 | 1.6428697 | 0.1137348 |  | 0.711731 | 1.6772865 | 0.0990928 |
| 0.3934435 | 1.7713547 | 0.0275674 |  | 0.2451613 | 0.9317484 | 0.7815237 |  | 0.5998855 | 1.2381031 | 0.5309776 |  | 0.1406883 | 1.2965583 | 0.3725003 |  | 0.5792564 | 1.5085784 | 0.2069082 |  | 0.7266983 | 1.522987 | 0.1965258 |
| 0.5923423 | 1.6411284 | 0.2052338 |  | 0.7618715 | 2.6193659 | 0.1587342 |  | 0.600399 | 1.284195 | 0.4627356 |  | 0.8991495 | 0.9456463 | 0.9374505 |  | 0.5913497 | 1.4180303 | 0.3028715 |  | 0.7392966 | 1.5838283 | 0.15739 |
| 0.2147348 | 1.1639523 | 0.5804022 |  | 0.4013304 | 0.8365752 | 0.467455 |  | 0.6041397 | 1.1377127 | 0.7173773 |  | 0.6469072 | 1.7702108 | 0.0674222 |  | 0.5926211 | 1.26015 | 0.5149171 |  | 0.8039647 | 1.6715822 | 0.1133121 |
| 0.3897522 | 1.800462 | 0.0217226 |  | 0.3396364 | 0.7995331 | 0.3622368 |  | 0.6084967 | 1.1964541 | 0.6144754 |  | 0.4946524 | 0.9154277 | 0.7235623 |  | 0.5937677 | 1.3734636 | 0.3705266 |  | 0.8130211 | 1.5317549 | 0.2075183 |
| 0.7000635 | 1.5835211 | 0.3122316 |  | 0.2826087 | 0.9184911 | 0.7348276 |  | 0.6255754 | 1.0669159 | 0.8627523 |  | 0.7396694 | 1.6672942 | 0.1285856 |  | 0.5959241 | 1.5063732 | 0.2461974 |  | 0.8263665 | 1.6728577 | 0.1269106 |
| 0.3298849 | 1.3548182 | 0.2174659 |  | 0.5567376 | 0.9663828 | 0.9089698 |  | 0.6258719 | 0.953234 | 0.9039524 |  | 0.4860197 | 1.0122042 | 0.9608821 |  | 0.6027733 | 1.3489935 | 0.4216704 |  | 0.8527778 | 1.8486687 | 0.0669851 |
| 0.7107416 | 1.3031969 | 0.6013732 |  | 0.6883681 | 1.460444 | 0.4072726 |  | 0.6334661 | 1.0395219 | 0.9222214 |  | 0.872428 | 1.2094736 | 0.6797303 |  | 0.6196742 | 1.1635005 | 0.7020659 |  | 0.8528302 | 1.9596545 | 0.0441852 |
| 0.3582712 | 1.64383 | 0.0469469 |  | 0.5562457 | 0.8892242 | 0.6942955 |  | 0.6509067 | 0.9410235 | 0.8862328 |  | 0.4202226 | 0.8291509 | 0.4452665 |  | 0.6207692 | 1.3145839 | 0.4893481 |  | 0.8643533 | 1.7799038 | 0.1004219 |
| 0.5057359 | 1.9464021 | 0.0560471 |  | 0.5820569 | 1.1572733 | 0.6680071 |  | 0.6907589 | 1.0334289 | 0.9383118 |  | 0.5622522 | 0.9480622 | 0.8513105 |  | 0.6268657 | 1.4121527 | 0.3819478 |  | 0.8685092 | 1.6549858 | 0.1733076 |
| 0.5055767 | 1.7814553 | 0.0994421 |  | 0.5157186 | 0.8735941 | 0.6067658 |  | 0.6926092 | 0.8822716 | 0.7858484 |  | 0.5649819 | 0.9085163 | 0.7477169 |  | 0.6647673 | 1.5651402 | 0.2544681 |  | 0.8805237 | 1.8171908 | 0.1047323 |
| 0.5238476 | 1.7515571 | 0.128109 |  | 0.5934959 | 1.2065412 | 0.5974429 |  | 0.7055723 | 0.9761573 | 0.9582668 |  | 0.7565337 | 1.5092187 | 0.2432204 |  | 0.6669903 | 1.7665378 | 0.1453619 |  | 0.8927659 | 2.0655524 | 0.0471172 |
| 0.7641203 | 0.7854066 | 0.7317853 |  | 0.7520798 | 1.9536208 | 0.337248 |  | 0.7345201 | 0.8878181 | 0.8161358 |  | 0.8806405 | 1.1059924 | 0.8438166 |  | 0.7191977 | 1.7266129 | 0.1919701 |  | 0.9004785 | 1.8405378 | 0.1173659 |
| 0.6311378 | 1.6412028 | 0.2365731 |  | 0.7502081 | 1.9283555 | 0.2539014 |  | 0.7398119 | 0.7521527 | 0.6260085 |  | 0.5399268 | 0.9138941 | 0.7302127 |  | 0.7220779 | 1.7380511 | 0.2247486 |  | 0.9032028 | 1.8152822 | 0.1529845 |
| 0.6998478 | 1.3517965 | 0.5100777 |  | 0.6382175 | 1.3041394 | 0.5297789 |  | 0.7432229 | 0.5271862 | 0.3604422 |  | 0.7756233 | 1.2368638 | 0.5901583 |  | 0.7236487 | 1.4788675 | 0.441141 |  | 0.9051808 | 1.5384712 | 0.3450733 |
| 0.4492752 | 1.8540209 | 0.0360345 |  | 0.5 | 0.8686757 | 0.5837573 |  | 0.7613105 | 0.6141256 | 0.489066 |  | 0.7690418 | 1.4333762 | 0.3319709 |  | 0.7266187 | 1.1375332 | 0.8256727 |  | 0.9095841 | 1.2176284 | 0.6988651 |
| 0.3854637 | 1.9972385 | 0.0056061 |  | 0.611381 | 1.2446827 | 0.5797182 |  | 0.7817029 | 0.7768153 | 0.7224145 |  | 1 |  |  |  | 0.7378105 | 1.5167034 | 0.4743467 |  | 0.9180819 | 1.0501848 | 0.9330652 |
| 0.7404801 | 0.9737798 | 0.9635936 |  | 0.606826 | 1.1669979 | 0.6964836 |  | 0.8350605 | 0.9815052 | 0.9790999 |  | 0.907916 | 0.4740174 | 0.4445589 |  | 0.7443541 | 1.0732103 | 0.9209908 |  | 0.9225807 | 1.2015125 | 0.7520835 |
| 0.9403071 |  |  |  | 0.9354839 |  |  |  | 0.8735984 | 1.3493886 | 0.6727021 |  | 0.9239131 | 0 | 0.2273957 |  | 0.7543045 | 1.2529699 | 0.7509773 |  | 0.9262295 | 0.800533 | 0.7524706 |
| One-factor model---Kaplan-Meier survival curve were used by R packages(survival package and survminer package were used). HR: Hazard Ratio; AMR: Average methylation rate. MR:Methylation rate | | | | | | | | | | | | | | | | | | | | | | |

| Supplementary table 2: Prediction of transcription factor binding site | | | |
| --- | --- | --- | --- |
| Transcription Factors | Strand | Prediction sequence | Concerning Sites |
| EGR1 | 1 | acccCGacccCGCG | M27, M26,M25 |
| EGR2 | 1 | cCGacccCGCG | M27, M26,M25 |
| EGR3 | 1 | cccCGacccCGCGac | M27, M26,M25 |
| FOXA1 | -1 | CGtttgtttgtttgC | M5 |
| FOXC1 | 1 | CGCGcaaacaa | M6,M5 |
| FOXC2 | 1 | CGCGcaaacaaa | M6,M5 |
| FOXF2 | 1 | ccCGCGcaaacaaa | M6,M5 |
| GLIS2 | 1 | aacccCGCGcaaac | M6,M5 |
| KLF16 | 1 | acccCGacccC | M27 |
| KLF5 | 1 | acccCGaccc | M27 |
| 1 | cccCGacccC | M27 |
| 1 | acccCGCGca | M6,M5 |
| NR2C2 | -1 | CGgggtCGgggttgt | M27，M26 |
| NR2F1 | -1 | tCGaggtCGCGgg | M26.M25,24 |
| GLIS2 | 1 | aacccCGCGca | M6,M5 |
| SP1 | 1 | cccCGacccCG | M27,M26 |
| SP2 | 1 | acccCGacccCGCGa | M27, M26,M25 |
| SP3 | 1 | acccCGacccC | M27 |
| SP4 | 1 | ttaacccCGCGcaaaca | M6,M5 |
| SP8 | 1 | acaacccCGacc | M27 |
